# Supplementary material for: Two Natural Flavonoid Substituted Polysaccharides from Tamarix chinensis: Structural Characterization and Anticomplement Activities
Source: MDPI journal article supplement (doi:10.3390/molecules27144532), 2022-07-15
Supplement: s1 [file s1]

# Two Natural Flavonoid Substituted Polysaccharides from *Tamarix chinensis*: Structural Characterization and Anticomplement Activities

Yukun Jiao, Yiting Yang, Lishuang Zhou, Daofeng Chen \* and Yan Lu \*

School of Pharmacy, Institutes of Integrative Medicine, Fudan University, Shanghai, 201203, China; 17111030034@fudan.edu.cn (Y.J.); 17211030024@fudan.edu.cn (Y.Y.); 20111030064@fudan.edu.cn (L.Z.)

\* Correspondence: dfchen@shmu.edu.cn (D.C.); luyan@fudan.edu.cn (Y.L.)

## Supplementary methods

### S1. Materials

Monosaccharide standards, NaBH<sub>4</sub>, D<sub>2</sub>O, trifluoroacetic acid (TFA), 1-phenyl-3-methyl-5-pyrazolone (PMP), *N*-cyclohexyl-*N*-(2-morpholinoethyl) carbodiimide metho-*p*-toluenesulphonate (CMC) and anhydrous DMSO were purchased from Sigma-Aldrich (St. Louis, MO, USA). L-cysteine methyl ester, *O*-tolyl isothiocyanate heparin and quercetin CRS (purity ≥ 98%) were purchased from Macklin Bio-chem Co. Ltd (Shanghai, China). Packing material DEAE-cellulose and Sephacryl S-200 were purchased from GE Healthcare Bio-Sciences (Piscataway, NJ, USA).

The barbital buffered saline was purchased from Beijing leagene biotech. Co. Ltd (Beijing, China). Sheep erythrocytes (EAs) were purchased from Shanghai Shengwei biotech. Co. Ltd (Shanghai, China). ABTS and FARP Elisa kits were purchased from Beyotime biotech. Co. Ltd (Shanghai, China). Guinea pigs and New Zealand white rabbits were purchased from the Laboratory Animals Research Institute of Fudan University, Shanghai, China. Guinea pig sera (GPS) were obtained from Guinea pigs and anti-sheep erythrocyte antibody was from rabbit antiserum which was provided by Associate Prof. Yunyi Zhang (School of Pharmacy, Fudan University).

### S2. Homogeneity and Molecular Weight Determination

The homogeneity of MBAP-1 and MBAP-2 was analyzed on an Agilent 1260 HPLC system using the G5000 PW<sub>XL</sub> (7.6 mm × 300 mm, i.d. 10 μm, TOSOH, Tokyo, Japan) and G3000 PW<sub>XL</sub> columns (7.6 mm × 300 mm, i.d. 7 μm, TOSOH, Tokyo, Japan) in series and eluted with water at 0.5 mL/min, detected with Agilent 1260 infinity ELSD. The drift tube temperature of ELSD was set at 100 °C, and the nitrogen pressure was 3.0 bar. The molecular weight (Mw) was determined by high performance size-exclusion chromatography combined with multi-angle laser photometry, as well as using a refractive index system (HPSEC-MALLS-RI) (DAWN HELEOS II, Wyatt, Santa Barbara, CA, USA) according to the previous literature [1]. The data were analyzed using Wyatt ASTRA 6.1.5.22 software (Wyatt, Santa Barbara, CA, USA).

### S3. Monosaccharide Analysis of MBAP-2

The unknown monosaccharide in MBAP-2 was analyzed by GC-MS [2]. Briefly, MBAP-2 was firstly fully hydrolyzed with TFA (4 M) at 110 °C for 2 h, then reduced by NaBD<sub>4</sub> and acetylated by acetic anhydride/pyridine. Finally, the alditol acetates were analyzed by GC-MS (QP 2010 Ultra, Shimadzu, Japan) attached to a HP-5MS column (0.25 mm × 30 m, i.d. 0.25 μm, Thermo, Waltham, MA, USA). The partially methylated alditol acetates (PMAAs) were assigned by ion fragment analysis.

#### *S4. Reduction, Methylation and GC-MS Analysis*

First, MBAP-1 were reduced three times with CMC-NaBH<sub>4</sub> using the method described before [3]. Furthermore, the reduced product of MBAP-1 (labeled as MBAP-1R), MBAP-1, and MBAP-2 were methylated according to the Hakomori method with some modifications. In brief, MBAP-1R, MBAP-1 and MBAP-2 were dissolved in DMSO, methylated with CH<sub>3</sub>I, hydrolyzed using TFA, reduced by NaBD<sub>4</sub> and acetylated by acetic anhydride/pyridine. The derivative products were analyzed by GC-MS (QP 2010 Ultra, Shimadzu, Kyoto, Japan) attached to a TG-5MS column (0.25 mm × 30 m, i.d. 0.25 μm, Thermo, Waltham, MA, USA). The operation procedures of GC analysis were set as follows: injection and detector temperatures were both 250 °C. The column temperature procedure was set as follows: initial 150 °C and holding for 5 min, increasing at 2 °C/min to 220 °C, holding for 10 min, and then raised at 5 °C/min to 240 °C, holding for 5 min. The partially methylated alditol acetates (PMAAs) were assigned by comparison with retention time, previous reports, and the complex carbohydrate research center spectral database (CCRC, <https://glygen.ccruc.uga.edu/ccrc/specdb/ms/pmaa/pframe.html#na>), and their molar ratios were evaluated by the peak areas.

#### *S5. NMR Spectroscopy Analysis*

The <sup>1</sup>H-NMR, <sup>13</sup>C-NMR, HSQC and HMBC spectra were recorded at 24 °C with an NMR spectrometer (600 M, AVANCE III HD, Bruker, Fällanden, Switzerland). The detailed parameters are summarized in Table S1.

### **Supplementary Table and Figure captions**

**Table S1.** The detailed setting parameters of MBAP-1 and MBAP-2 in NMR experiments.

**Figure S1.** The HPGPC-ELSD results of MBAP-1 (**A**) and MBAP-2 (**B**).

**Figure S2.** The GC-MS spectrogram of monosaccharide of MBAP-2.

**Figure S3.** FT-IR spectroscopy analysis of MBAP-1 and MBAP-2. (**A**) The spectrum of MBAP-1. (**B**) The spectrum of MBAP-2.

**Figure S4.** The mass spectra of PMAAs of MBAP-1.

**Figure S5.** The mass spectra of PMAAs of MBAP-2.

**Figure S6.** The  $^1\text{H}$ -NMR (**A**) and  $^{13}\text{C}$ -NMR (**B**) spectra of MBAP-1.

**Figure S7.** The  $^1\text{H}$ -NMR (**A**) and  $^{13}\text{C}$ -NMR (**B**) spectra of MBAP-2.

**Figure S8.** The  $^1\text{H}$ -NMR and  $^{13}\text{C}$ -NMR spectra of quercetin in  $\text{d}_6$ -DMSO and  $\text{d}_6$ -DMSO:  $\text{D}_2\text{O}$  (1:1).

**Figure S9.** The AFM results of MBAP-1 and MBAP-2.

### Supplementary Table

**Table S1.** The detailed setting parameters of MBAP-1 and MBAP-2 in NMR experiments.

| Sample Name | Experiment      | Spectrometer Frequency<br>(MHz) | Spectral Width    | Number of<br>Scans | Acquisition Time |
|-------------|-----------------|---------------------------------|-------------------|--------------------|------------------|
| MBAP-1      | $^1\text{H}$    | 600.13                          | 12019.2           | 64                 | 1.3631           |
|             | $^{13}\text{C}$ | 150.9                           | 33333.3           | 14943              | 0.983            |
|             | HSQC            | (600.13, 150.90)                | (6313.1, 26455.0) | 128                | 0.0811           |
|             | HMBC            | (600.13, 150.90)                | (6313.1, 33112.6) | 928                | 0.1622           |
| MBAP-2      | $^1\text{H}$    | 600.13                          | 12019.2           | 64                 | 1.3631           |
|             | $^{13}\text{C}$ | 150.9                           | 36231.9           | 10240              | 0.9044           |
|             | HSQC            | (600.13, 150.90)                | (7812.5, 24875.6) | 128                | 0.1311           |
|             | HMBC            | (600.13, 150.90)                | (6313.1, 33112.6) | 192                | 0.1622           |

## Supplementary Figures

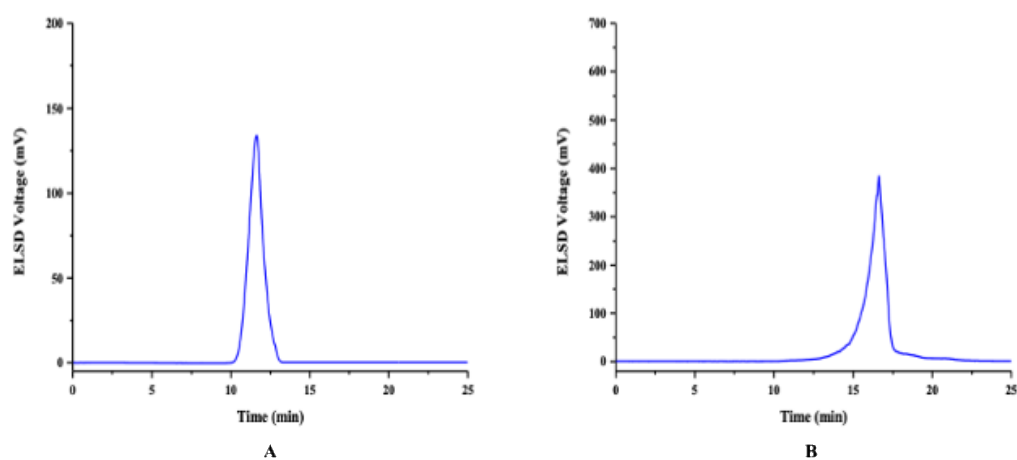

**Figure S1.** The HPGPC-ELSD results of MBAP-1 (A) and MBAP-2 (B).

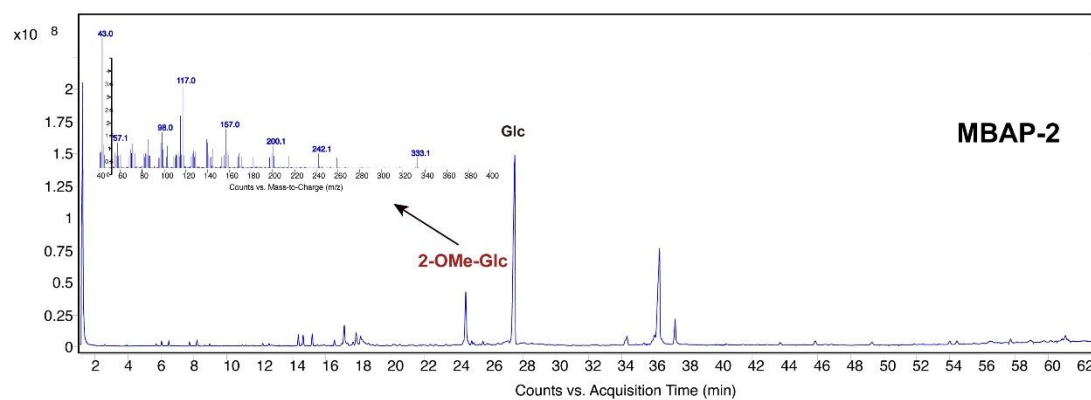

**Figure S2.** The GC-MS spectrogram of monosaccharide of MBAP-2.

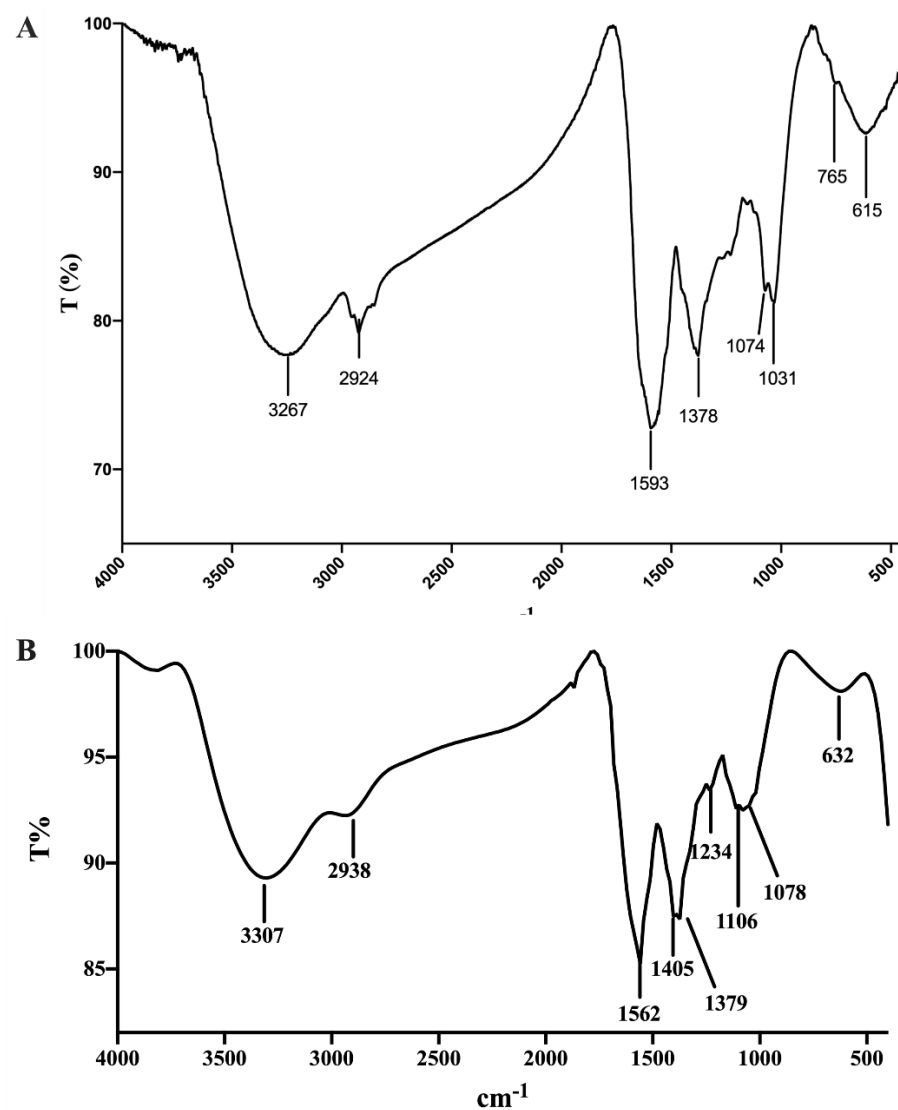

**Figure S3.** FT-IR spectroscopy analysis of MBAP-1 and MBAP-2. (A) The spectrum of MBAP-1. (B) The spectrum of MBAP-2.

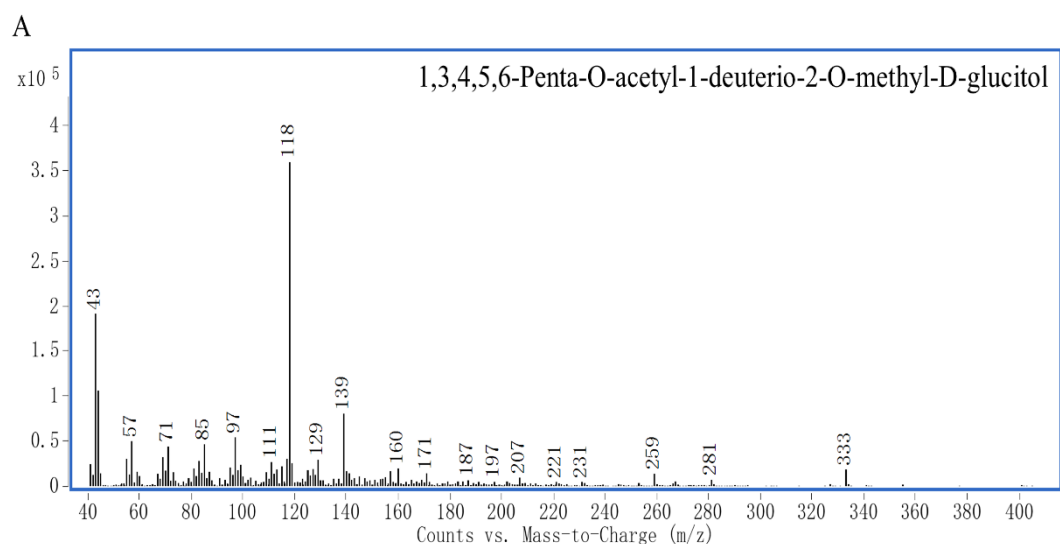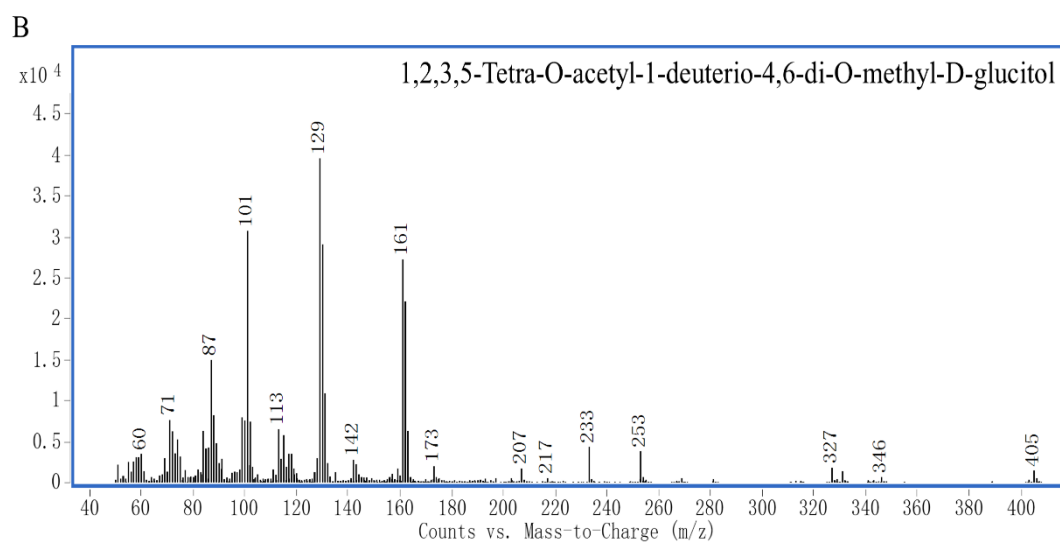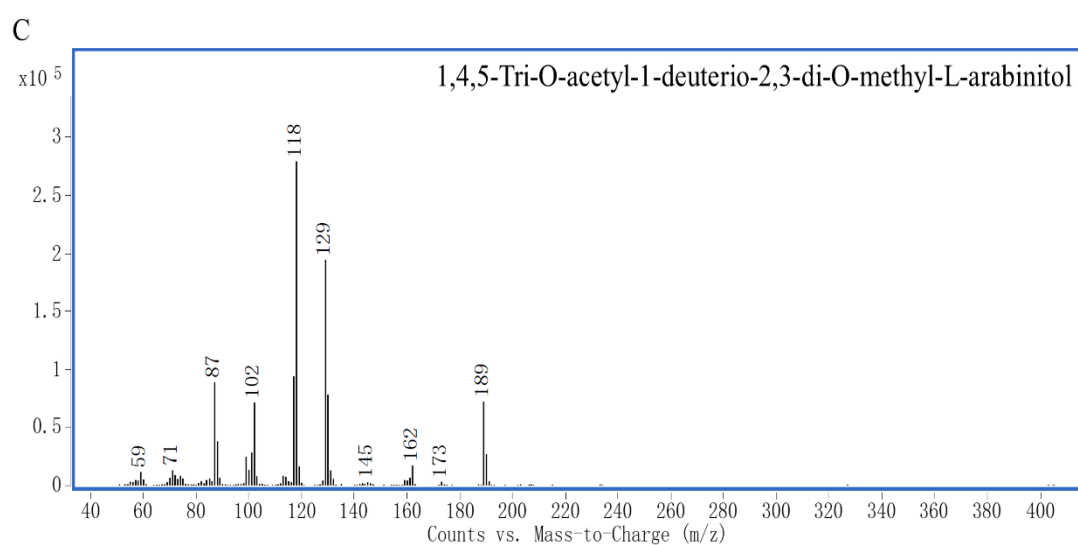

D

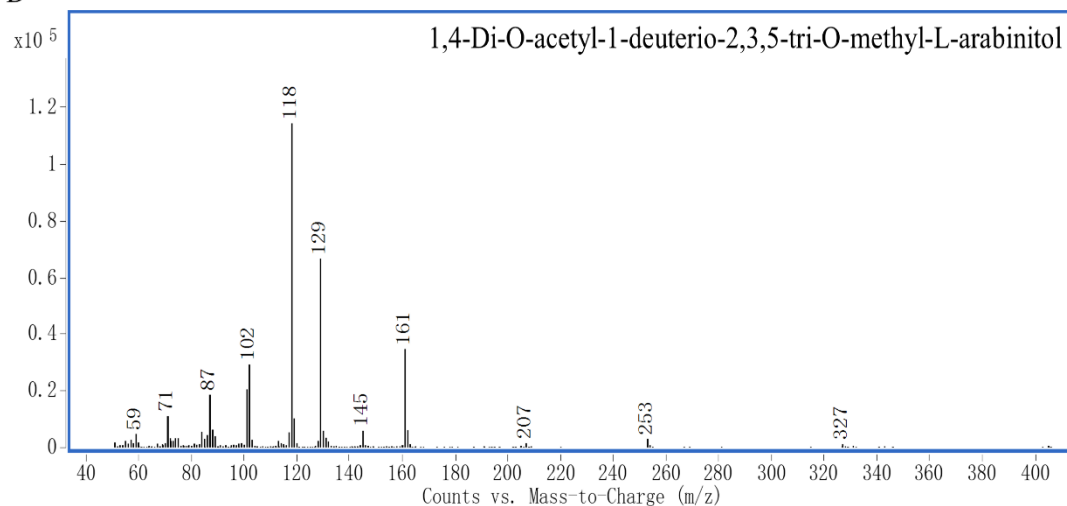

E

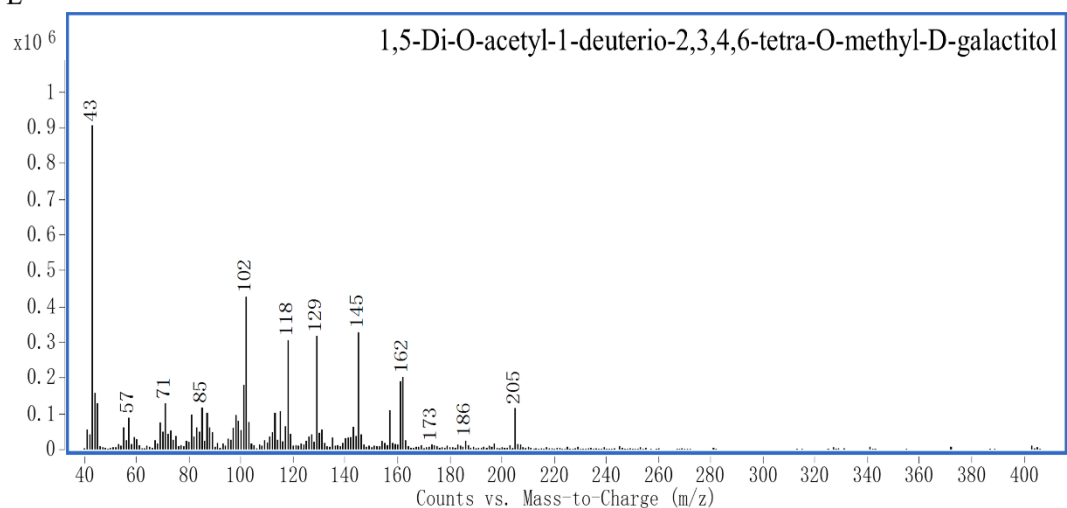

F

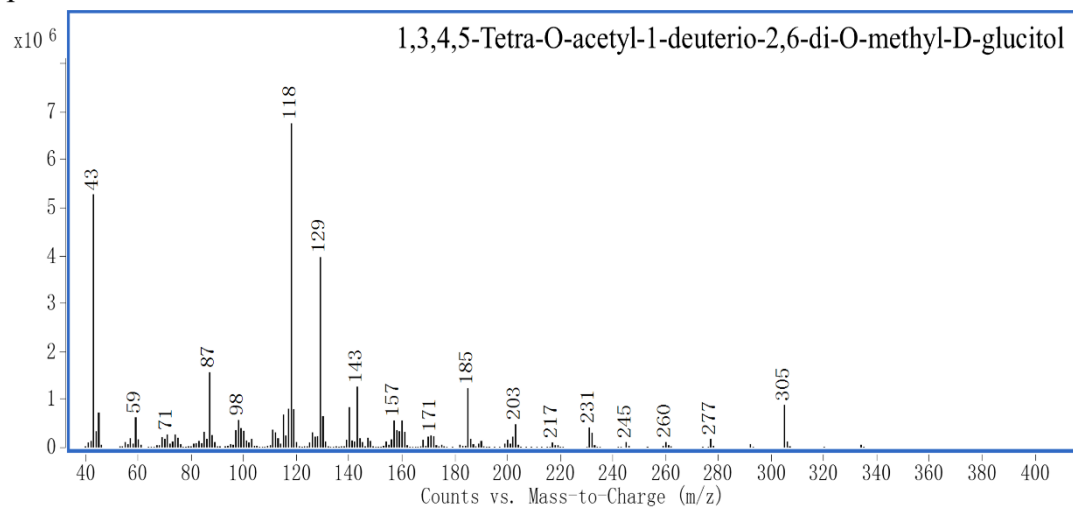



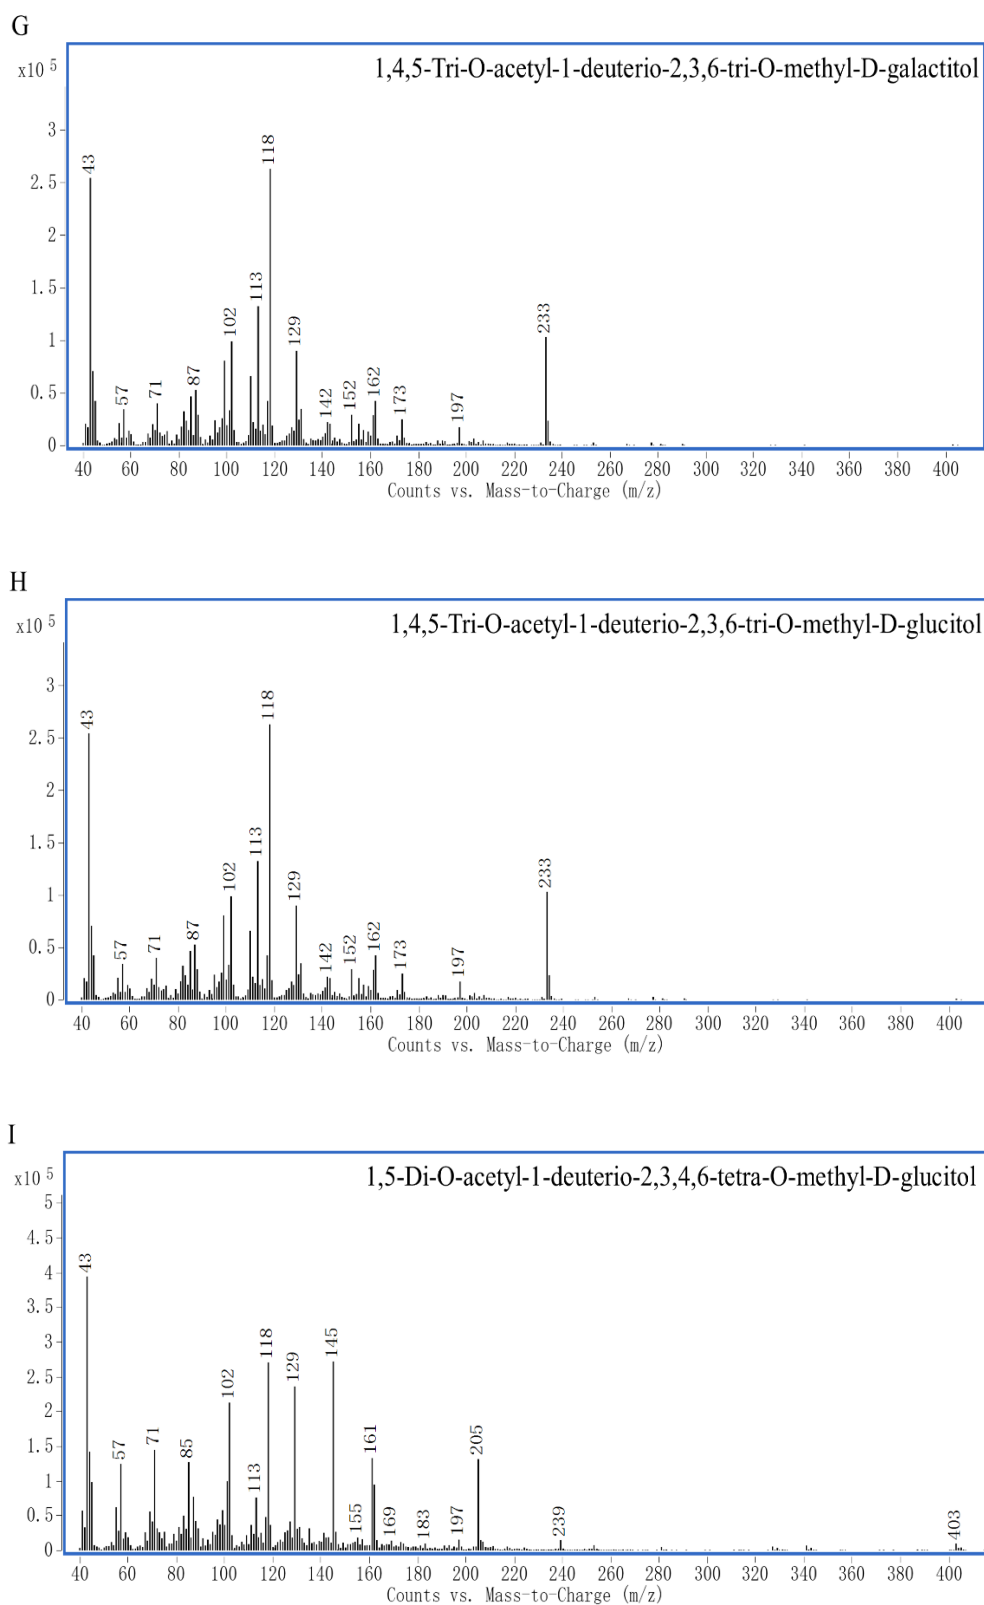

**Figure S4.** The mass spectra of PMAAs of MBAP-1. (A) 1,3,4,5,6-Penta-*O*-acetyl-1-deuterio-2-*O*-methyl-D-glucitol, (B) 1,2,3,5-Tetra-*O*-acetyl-1-deuterio-4,6-di-*O*-methyl-D-glucitol, (C) 1,4,5-Tri-*O*-acetyl-1-deuterio-2,3-di-*O*-methyl-D-arabinitol, (D) 1,4-Di-*O*-acetyl-1-deuterio-2,3,5-tri-*O*-methyl-L-arabinitol, (E) 1,5-Di-*O*-acetyl-1-deuterio-2,3,4,6-tetra-*O*-methyl-D-galactitol, (F) 1,3,4,5-Tetra-*O*-acetyl-1-deuterio-2,6-di-*O*-methyl-D-glucitol, (G) 1,4,5-Tri-*O*-acetyl-1-deuterio-2,3,6-tri-*O*-methyl-D-galactitol, (H) 1,4,5-Tri-*O*-acetyl-1-deuterio-2,3,6-tri-*O*-methyl-D-glucitol, (I) 1,5-Di-*O*-acetyl-1-deuterio-2,3,4,6-tetra-*O*-methyl-D-glucitol.

A

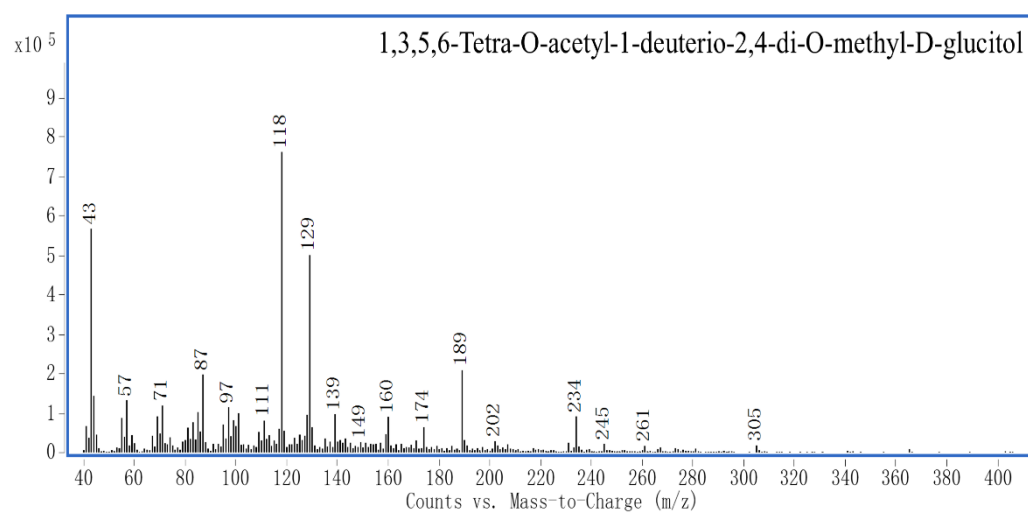

B

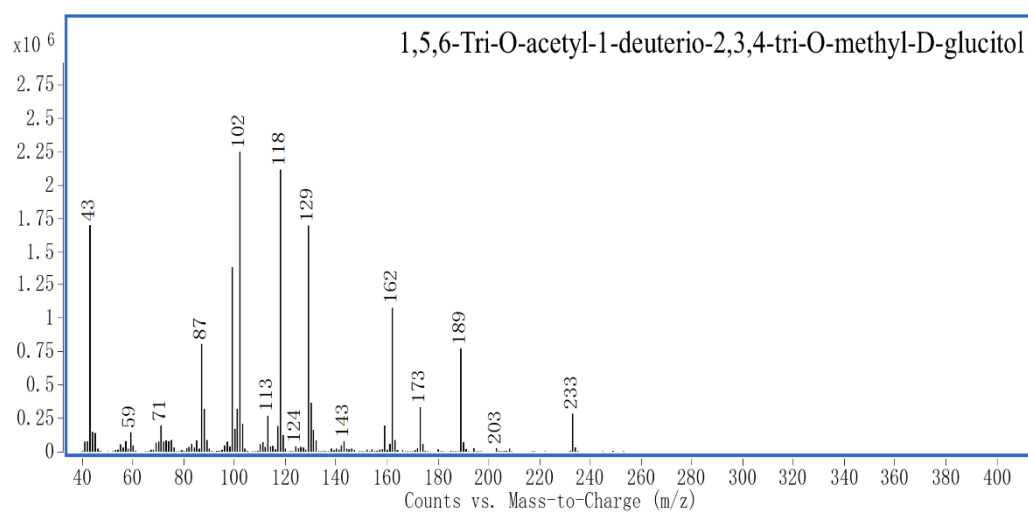

C

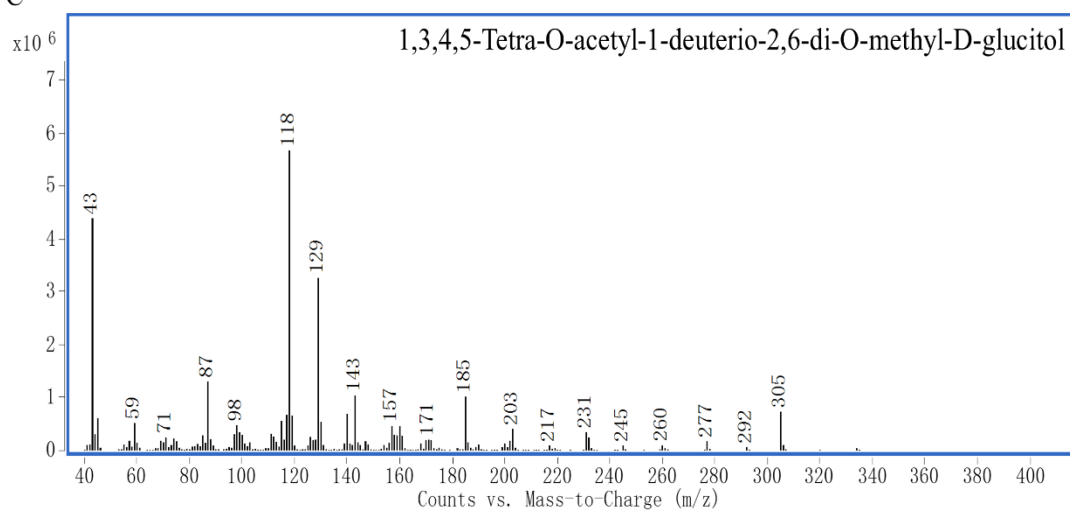

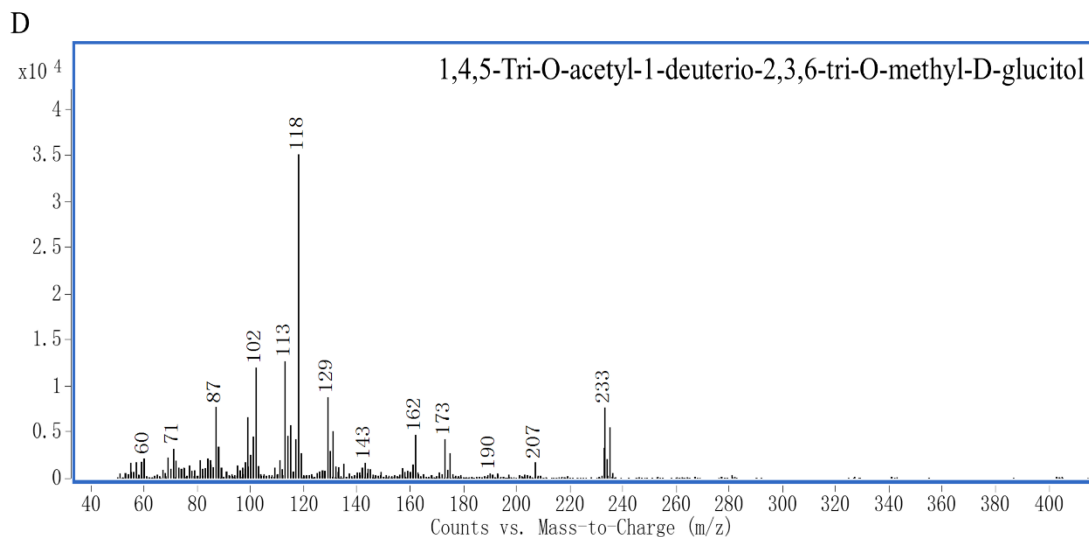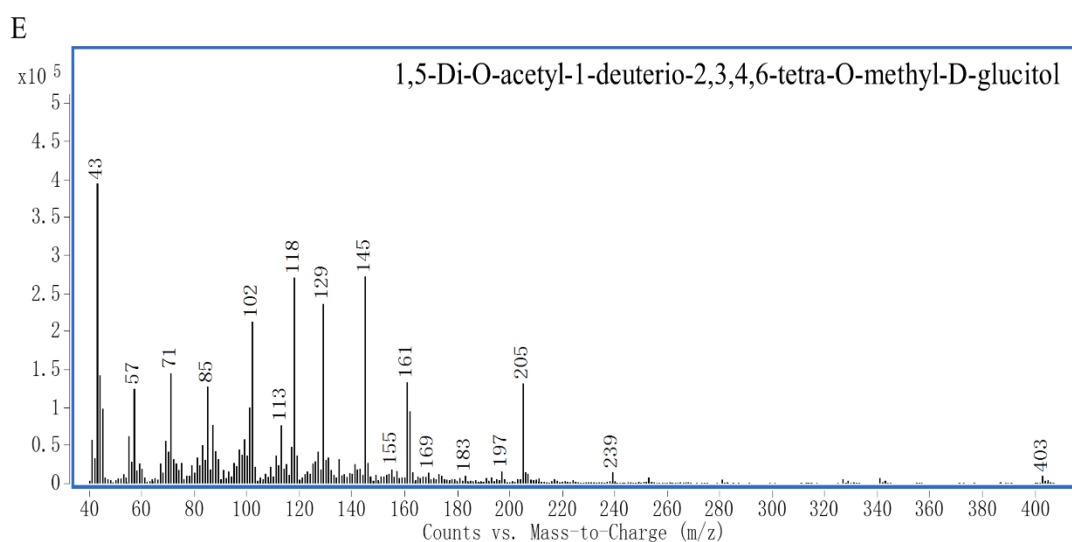

**Figure S5.** The mass spectra of PMAAs of MBAP-2. (A) 1,3,5,6-Tetra-*O*-acetyl-1-deuterio-2,4-di-*O*-methyl-D-glucitol, (B) 1,5,6-Tri-*O*-acetyl-1-deuterio-2,3,4-tri-*O*-methyl-D-glucitol, (C) 1,3,4,5-Tetra-*O*-acetyl-1-deuterio-2,6-di-*O*-methyl-D-glucitol, (D) 1,4,5-Tri-*O*-acetyl-1-deuterio-2,3,6-tri-*O*-methyl-D-glucitol, (E) 1,5-Di-*O*-acetyl-1-deuterio-2,3,4,6-tetra-*O*-methyl-D-glucitol.

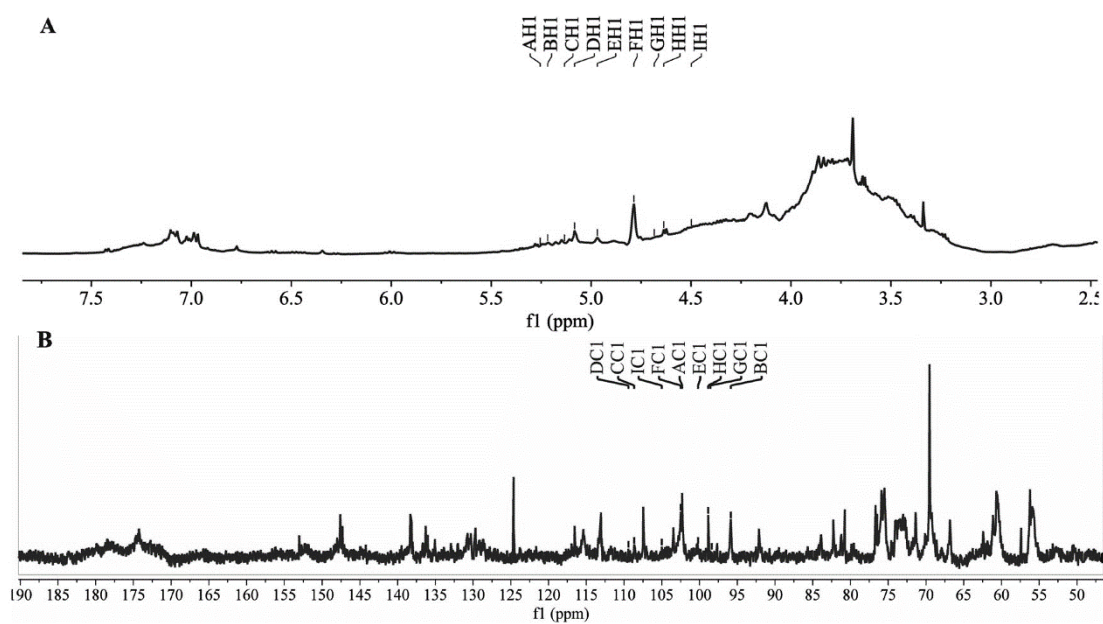

**Figure S6.** The  $^1\text{H}$ -NMR (**A**) and  $^{13}\text{C}$ -NMR (**B**) spectra of MBAP-1.

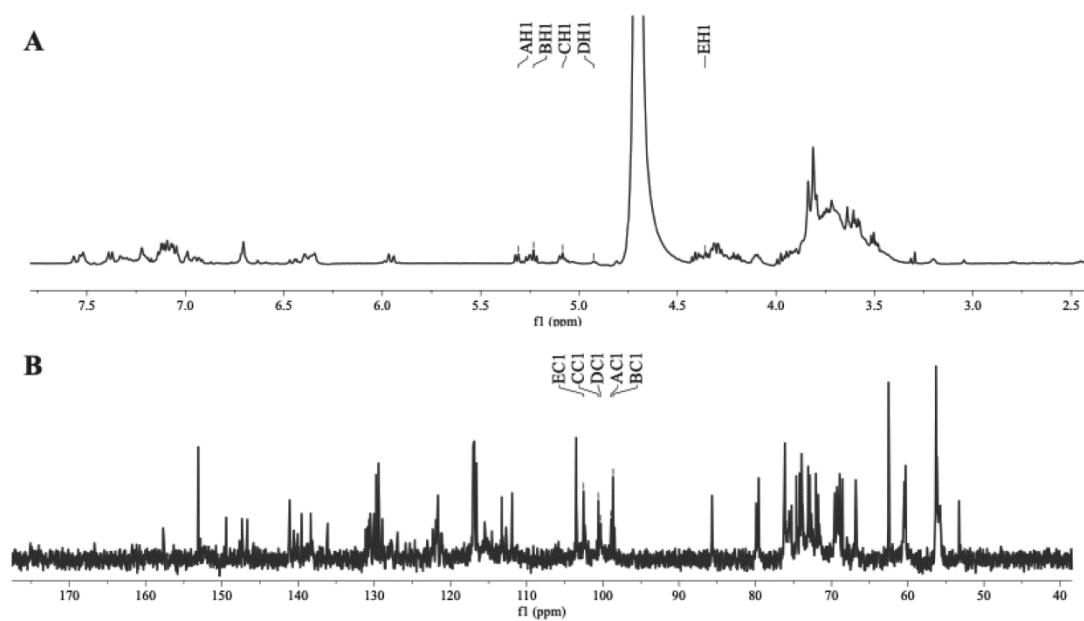

**Figure S7.** The  $^1\text{H}$ -NMR (**A**) and  $^{13}\text{C}$ -NMR (**B**) spectra of MBAP-2.

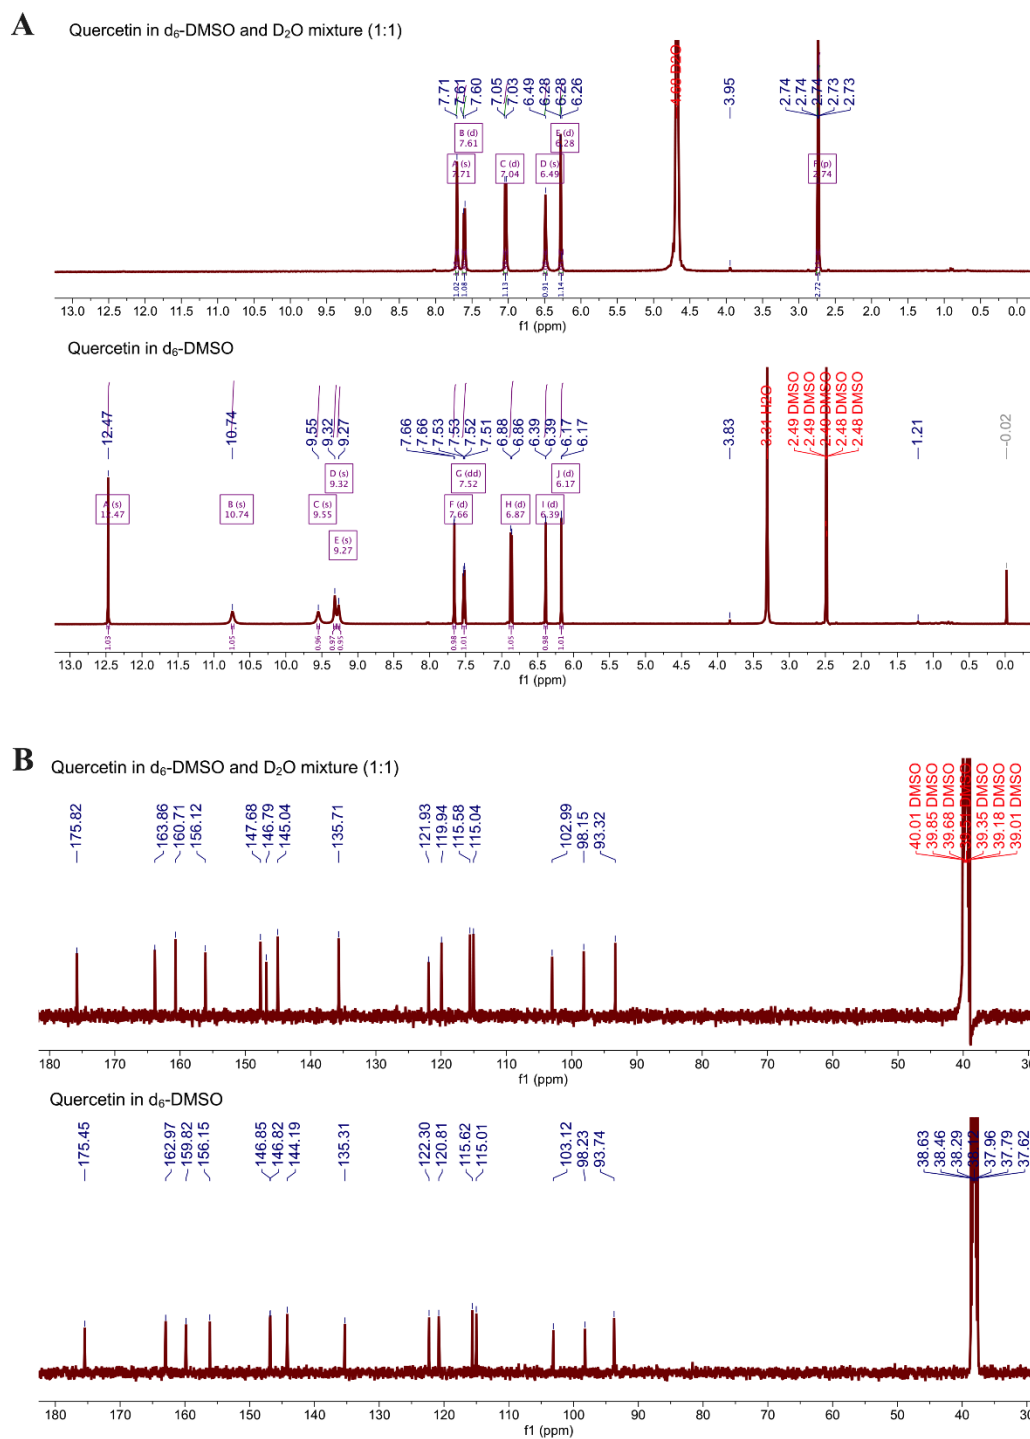

**Figure S8.** The  $^1H$ -NMR and  $^{13}C$ -NMR spectra of quercetin in  $d_6$ -DMSO and  $d_6$ -DMSO:  $D_2O$  (1:1).

**MBAP-1**

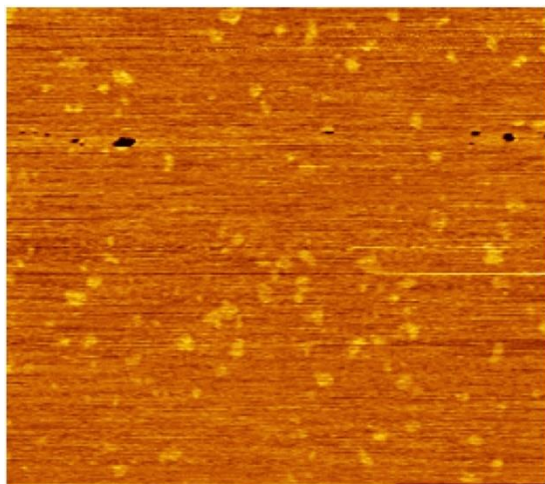

**MBAP-2**

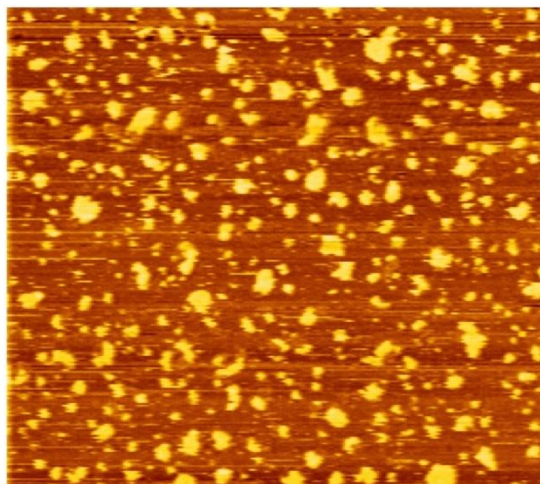

**Figure S9.** The AFM results of MBAP-1 and MBAP-2.

## References

1. Zhang, S.J.; Zhang, Q.; An, L.J.; Zhang, J.J.; Li, Z.G.; Zhang, J.; Li, Y.H.; Tuerhong, M.; Ohizumi, Y.; Jin, J.; et al. A fructan from *Anemarrhena asphodeloides* Bunge showing neuroprotective and immunoregulatory effects. *Carbohydr. Polym.* **2020**, *229*, 115477.
2. Chen, X.; Cao, D.; Zhou, L.; Jin, H.; Dong, J.; Yao, J.; Ding, K. Structure of a polysaccharide from *Gastrodia elata* Bl., and oligosaccharides prepared thereof with anti-pancreatic cancer cell growth activities. *Carbohydr. Polym.* **2020**, *86*, 1300–1305.
3. Huo, J.; Lu, Y.; Jiao, Y.; Chen, D. Structural characterization and anticomplement activity of an acidic polysaccharide from *Hedyotis diffusa*. *Int. J. Biol. Macromol.* **2020**, *155*, 1553–1560.
